1 **The Effect of Diabetes Mellitus on the Pharmacokinetics of Tuberculosis Drugs**

2

3

4 **Authors:** Muge Cevik<sup>1\*</sup>, Ann Sturdy<sup>2</sup>, Bart G.J. Dekkers<sup>3</sup>, Onno W. Akkerman<sup>4,5</sup>, Stephen H.  
5 Gillespie<sup>1</sup>, Jan Willem C. Alffenaar<sup>6,7,8</sup>

6

7

8 **Affiliations:**

9 1. Division of Infection and Global Health Research, School of Medicine, University of St Andrews,  
10 UK

11 2. Department of Infectious Disease, Faculty of Medicine, Imperial College London, UK

12 3. University of Groningen, University Medical Center Groningen, Department of Clinical Pharmacy  
13 and Pharmacology, Groningen, the Netherlands

14 4. University of Groningen, University Medical Center Groningen, Department of Pulmonary  
15 Diseases and Tuberculosis, Groningen, the Netherlands

16 5. University of Groningen, University Medical Center Groningen, Tuberculosis Center Beatrixoord,  
17 Haren, the Netherlands

18 6. The University of Sydney Institute for Infectious Diseases, Sydney, NSW, Australia.

19 7. School of Pharmacy, Faculty of Medicine and Health, The University of Sydney, Sydney, NSW,  
20 Australia.

21 8. Westmead Hospital, Westmead, NSW, Australia

22

23 **\*Corresponding author:**

24 Dr Muge Cevik

25 Division of Infection and Global Health Research,

26 School of Medicine, University of St Andrews, Fife, KY16 9TF

27 Telephone number: +447732800814

28 Email address: mc349@st-andrews.ac.uk

29

30 **This is the first systematic review to comprehensively examine the impact of DM on the**  
31 **pharmacokinetics of TB drugs. While some studies showed lower plasma concentrations, we**  
32 **observed significant heterogeneity; therefore, no recommendations can be made.**

33

34 **Abstract**

35

36 While pharmacokinetics (PK) of many drugs is known to be altered in individuals with diabetes  
37 mellitus (DM), the effects of DM on the PK of anti-tuberculosis (TB) drugs remains poorly  
38 understood.

39

40 We performed a systematic review through searches of major databases from 1946 to 6 July 2023.  
41 The literature search identified 4173 potentially relevant articles. After reviewing the eligibility  
42 criteria, 21 articles were included that assessed the PK of anti-TB drugs among patients with DM.

43

44 Most articles focused on first line TB drugs; we identified 16 studies assessing rifampicin PK, 9  
45 studies on isoniazid, 8 on pyrazinamide and 3 assessing ethambutol. Only 2 studies reported on  
46 second line anti-TB treatment. While some studies showed lower plasma concentrations of TB  
47 medications among DM patients, this finding was not consistent. In addition, we observed high  
48 variability in findings and significant heterogeneity among studies in terms of study design and  
49 differences in demographics.

50

51 This review provides detailed overview of the limited evidence available regarding the PK of anti-  
52 TB medications in patients with DM. However, due to significant heterogeneity between studies,  
53 no conclusions could be made. Adequately designed PK studies using standardise methodologies  
54 are urgently needed to make recommendations regarding drug dosing in patients affected both by  
55 TB and DM.

56

57

58

59

60

61

## 62 Introduction

63

64 The global tuberculosis (TB) burden remains substantial, with more than 10 million people newly  
65 diagnosed per year [1]. TB patients often have other co-morbidities that influence the disease  
66 course and outcome. For instance, diabetes mellitus (DM) has been shown to increase the risk of  
67 acquiring TB [2, 3] and progression to active disease [3, 4]. The coexistence of TB and DM (TB-DM)  
68 has been associated with a 4-fold increased risk of treatment failure and 2-fold increased risk of  
69 death [5-7]. In addition, TB-DM patients have been shown to have a higher bacterial burden,  
70 delayed sputum culture conversion and a greater risk of developing drug resistance [6, 8].

71

72 Over the next 10 years, the prevalence of DM is estimated to double globally, affecting over 600  
73 million individuals with a considerable increase in the African continent [9-11]. While DM has long  
74 been acknowledged as an important risk factor for TB, the threat posed by the burden of these  
75 two epidemics has recently been recognised [12, 13]. It is now considered a major global public  
76 health concern by the World Health Organization (WHO) and a critical public health challenge in  
77 low- and middle-income countries, with the WHO subsequently adopting a collaborative  
78 framework for care and control of TB and DM [14].

79

80 While the burden of TB and DM co-disease is increasing rapidly, there is limited practical evidence  
81 to underpin guidelines for TB-DM patient management, such as length of treatment, drug dosing  
82 and use of therapeutic drug monitoring (TDM). Pharmacokinetics (PK) of anti-TB agents show  
83 inter- and intra-patient variability and co-morbidities may further influence plasma  
84 concentrations, as the PK of many other drugs are known to be altered in diabetic individuals [15].  
85 DM may affect kidney function, gastric emptying and drug metabolism pathways [15, 16]. This  
86 highlights the importance of understanding drug concentrations in TB-DM population as sub-  
87 therapeutic concentrations may contribute to the treatment failure and acquired drug resistance  
88 [17].

89

90 In this systematic review, we evaluated the available evidence on the PK of antituberculosis drugs  
91 in diabetic individuals to provide in-depth analysis to guide patient management and identify  
92 priorities for research.

93

## 94 Methods

95

## 96 ***Search Strategy***

97 We retrieved all original studies evaluating the effect of DM on the PK of all TB drugs  
98 recommended by the WHO for the treatment of drug-sensitive (DS) and drug-resistant TB  
99 including rifampicin (RIF), isoniazid (INH), pyrazinamide (PZA) and/or ethambutol (EMB). We  
100 systematically searched major databases; Medline, EMBASE, Web of Science and Scopus including  
101 conference abstracts from 1946 to 6<sup>th</sup> of July 2023 using Medical Subject Headings (MeSH) terms  
102 (Supplementary Material). We also manually screened the references of included original studies  
103 to obtain additional studies. To identify unpublished studies, <http://clinicaltrials.gov> was searched.  
104 This systematic review was conducted in accordance with the Preferred Reporting Items for  
105 Systematic Reviews and Meta-Analyses (PRISMA) statement. The protocol was registered at  
106 PROSPERO (CRD42022323566).

107

## 108 ***Study Selection***

109 Studies that reported PK of anti-TB medications among DM and non-DM participants were  
110 included. No restrictions on language and publication date were applied. Studies in adult and  
111 paediatric populations were included. General PK studies reporting a subgroup of DM participants  
112 were not eligible unless they included detailed PK parameters for DM and non-DM participants.  
113 Review articles, letters, case reports and case series with less than five participants and  
114 correspondence were excluded, as were studies without PK data, drug interaction studies, and  
115 non-human studies.

116

## 117 ***Data Extraction***

118 Two authors screened and retrieved articles according to the eligibility criteria and performed full  
119 text review and final article selection. From each study, the following variables were extracted:  
120 demographics of comparator group(s) and the DM group including age, weight, and sex, study  
121 design, DM diagnosis, and DM medications. Dose, dosing interval, sampling points, AUC, peak drug  
122 concentration ( $C_{max}$ ), half-life ( $t_{1/2}$ ), time to reach  $C_{max}$  ( $T_{max}$ ), volume of distribution ( $V_d$ ) and  
123 clearance (CL) were extracted from the included articles if available and were stratified by group. If  
124 these data were not reported, we also contacted the authors to request the data.

125

## 126 ***Risk of bias in included studies***

127 In the absence of available tools to assess risk of bias in PK studies, we assessed study quality and  
128 risk of bias using the ROBINS-I tool for non-randomised studies of interventions, which was used to  
129 assess PK studies in a recent publication [18, 19]. Any disagreements regarding grading of quality  
130 were resolved through discussion with a third author.

131

### 132 **Analysis**

133 Narrative synthesis of the findings was conducted and reported according to the Synthesis  
134 Without Meta-analysis (SWiM) guidelines [20]. Descriptive statistics was used to describe key  
135 outcome measures. The data were found to be too heterogenous to permit further quantitative  
136 synthesis.

137

### 138 **Results**

139 The systematic search identified 4173 potentially relevant articles. After removing duplicates,  
140 3464 articles were retrieved for initial screening of which a total of 49 studies were included for  
141 full text review. After reviewing the eligibility criteria, 21 articles were included that assessed the  
142 PK of anti-TB medications among TB-DM patients [21-41]. Five included papers presented the  
143 same data: in conference abstract [42-46] and then in published form [23, 29, 33, 36, 43]; we  
144 included data from the published report. One study was only published as a conference abstract  
145 and the authors were not able to share more data at the time of this review [47]. No relevant  
146 unpublished studies were found on the ClinicalTrials.gov. The study selection process is recorded  
147 in a PRISMA flow diagram (**Figure 1**).

148

### 149 **Rifampicin (Table 1)**

150 Of the 21 studies, 16 measured RIF plasma concentrations [21-23, 25, 27, 28, 30-36, 38-40],  
151 majority of which were prospective PK studies except one retrospective study reporting results  
152 based on routinely collected data [28]. RIF doses used were highly heterogeneous and are  
153 presented in Table 1.

154

155 Out of 16 studies, 7 reported AUC values; three studies with intensive sampling (> 6 samples) [31,  
156 32, 38] reported  $AUC_{0-24}$  mg.h/L, three studies reported  $AUC_{0-6}$  mg.h/L [21, 33, 36], and one  
157 reported  $AUC_{0-8}$  mg.h/L [27]. In one study,  $AUC_{0-6}$  mg.h/L to RIF was significantly lower in patients  
158 with TB-DM compared to those without DM) [33], another study found a lower trend  $AUC_{0-24}$   
159 mg.h/L in the DM group, but this was not statistically significant [32] and five studies found no

160 difference [21, 27, 31, 34, 38]. Of the three studies carrying out intensive sampling [31, 32, 38], no  
161 significant difference was shown.

162

163 Out of 16 studies, 15 measured RIF peak concentrations ( $C_{max}$ ); five demonstrated significantly  
164 lower RIF peak concentrations among diabetic patients compared to non-diabetics [22, 28, 33, 39,  
165 40] and ten studies showed no significant difference between diabetic and non-diabetic patients  
166 [21, 25, 27, 30-32, 34-36, 38]. Mean absolute RIF  $C_{max}$  was below the recommended range (above  
167 8 mg/L [48]) in diabetic and non-diabetic groups in the majority of studies, and within the  
168 recommended range only in the 3 studies with intensive sampling [31, 32, 38].

169

170 Eight studies measured the time to reach  $C_{max}$  ( $T_{max}$ ), which was longer in TB-DM participants in  
171 three studies [31-33] (although without reaching statistical significance in one study [33]) and 3  
172 studies found no significant difference [34, 36, 38]. In a study using population PK modelling,  
173 absorption rate constant ( $k_a$ ) was significantly increased and the volume of distribution ( $V_d$ ) was  
174 significantly increased in the DM [23], the authors inferring that the plasma concentrations would  
175 therefore be lower in the DM group. Another study found no difference in  $k_a$  or  $V_d$  between the  
176 TB and TB-DM groups in a 1 compartment model, but reduced clearance was observed and  $V_d$  was  
177 significantly higher in the TB-DM group when  $V_d$  was normalized to total body weight [31].

178

179 Raised blood glucose was inversely correlated with the rifampicin  $AUC/C_{max}$  in four studies [31, 33,  
180 39, 40], whereas three other studies found no association between HbA1c or fasting blood glucose  
181 (FBG) and plasma concentrations [25, 32, 38]. Two studies found that body weight and plasma  
182 concentrations were inversely correlated [22, 33].

183

#### 184 **Isoniazid (Table 2)**

185 Nine studies assessed isoniazid (INH) PK [21, 22, 26-28, 30, 32, 35, 37]. Of these, one was based on  
186 routinely collected retrospective data [28], four studies used 600 mg dosing 3 times per week [21,  
187 27, 30, 35] and only 1 study sampled intensively [32]. Four studies assessed for NAT2 status using  
188 different methods [26, 27, 32, 37]. We identified no studies with PK modelling.

189

190 Out of nine studies, four assessed the mean exposure; one  $AUC_{0-24}$  mg.h/L [32], two  $AUC_{0-6}$  mg.h/L  
191 [21, 37] and one  $AUC_{0-8}$  mg.h/L [27]. Of these, two studies demonstrated significantly lower mean  
192 exposure to INH [21, 32], although after adjustment for age, sex, and weight this difference

193 disappeared in one [21]. Two studies found no significant difference between the DM and non-DM  
194 groups [27, 37]. Four studies found INH  $C_{max}$  to be significantly lower in the DM group [21, 22, 30,  
195 32], though one reported no significant difference after adjustments for age, sex, and weight [21]  
196 and the remaining 4 studies found no significant difference [26-28, 37]. One study with intensive  
197 sampling found no significant difference [32]. Out of three studies assessing  $T_{max}$ , one found no  
198 significant difference in INH  $T_{max}$  between the DM and non-DM group, and two studies did not  
199 report comparative analysis [27, 37].

200

201 While one study reported concentrations to be negatively correlated with blood glucose [30], in  
202 two studies INH  $C_{max}/AUC$  was not correlated with FBG or HbA1c [26, 32]. In one study INH  
203 concentrations were inversely correlated with weight [22].

204

### 205 **Pyrazinamide (Table 3)**

206 Pyrazinamide PK was reviewed in eight studies [21, 22, 27, 29, 30, 32, 35, 38], all of which were  
207 prospective PK studies. Patients in all studies except two were on 1500 mg PZA dosing, whilst one  
208 study used 1600 mg for patients >50 kg and 1200 mg for patients <50 kg [32] and other used 20-30  
209 mg/kg [29]. Out of eight, four papers reported mean exposure to PZA; two reporting  $AUC_{0-24}$   
210 mg.h/L [32, 38], one  $AUC_{0-8}$  mg.h/L [27] and one  $AUC_{0-6}$  mg.h/L [21]. Mean exposure to PZA was  
211 significantly lower among DM participants in two studies [21, 27] and two studies with intensive  
212 sampling reported no significant difference in  $AUC_{0-24}$  mg.h/L [32, 38]. Out of six studies reporting  
213  $C_{max}$  three reported significantly lower  $C_{max}$  among DM compared to non-DM participants [21, 27,  
214 30], which remained significant after adjustments for age, sex, and weight [21] and three studies  
215 reported no significant difference [22, 32, 38]. Three studies measured  $T_{max}$  and none reported a  
216 statistically significant difference in  $T_{max}$  between the DM and non-DM TB groups.

217

218 No correlation between FBG and  $AUC/C_{max}$  was observed in two studies [32, 38] whereas one  
219 study showed a negative correlation between plasma PZA concentrations and blood glucose [30].  
220 In a population PK modelling study [29], increased apparent clearance was observed in TB-DM  
221 patients, most significantly in the group with patients >70 years and  $AUC_{0-24}$  mg.h/L was decreased  
222 in the DM group >70 years.

223

### 224 **Ethambutol (Table 4)**

225 Three included studies assessed the effect of DM on EMB PK [22, 32, 38]. Two reported  $AUC_{0-24}$   
226 mg.h/L and  $T_{max}$  [32, 38], all reported  $C_{max}$ . None of the studies reported statistically significant  
227 difference in AUC,  $C_{max}$ , and  $T_{max}$  between the DM and non-DM groups. No correlation was seen  
228 between FBG and  $AUC/C_{max}$  in two studies [32, 38]. We identified no studies with PK modelling.

229

### 230 **Other agents (Table 5)**

231 Two studies assessed the effect of DM on other agents; cycloserine [41], linezolid [41] and  
232 moxifloxacin [24]. A retrospective cross-sectional study reviewing the cycloserine and linezolid  
233 drug levels at 2 h post-dose in routine practice found that 55% of the samples had below the lower  
234 limit of recommended cycloserine plasma concentrations and 17% had low linezolid  
235 concentrations [41]. DM patients had a lower cycloserine exposure, although this was not  
236 statistically significant, and there was no association between linezolid exposure and DM. In a  
237 recent retrospective study evaluating moxifloxacin PK,  $AUC_{0-24h}$  was shown to be significantly  
238 lower in patients with DM compared to age, sex and RIF matched TB patients without DM [24]. In  
239 line, peak and trough concentrations were also reduced in DM patients. Although the drug  
240 absorption, volume of distribution and  $T_{max}$  were comparable between TB-DM and TB patients,  
241 moxifloxacin clearance was increased in TB-DM patients. Comparison of area under the unbound  
242 drug concentration–time curve/minimal inhibitory concentration (MIC) ratio indicate that  
243 exposure was already low in the majority of control patients, but none of the DM patients had  
244 adequate exposure to moxifloxacin.

245

### 246 **Risk of bias assessment**

247 The risk of bias for each domain across all included studies is given in Supplementary material.  
248 Prospective studies were the most common study design contributing to the review question,  
249 except three studies where routinely collected TDM was used. While all studies have made a  
250 comparative analysis between DM and non-DM population, all studies had moderate to serious  
251 risk of bias in at least one domain. There was a high risk of bias for baseline confounders that may  
252 have influenced the outcome result. For example, 11 out of 21 studies did not match DM and non-  
253 DM groups according to age or sex. Non-adjustment of host factors may influence the plasma  
254 concentrations, making it challenging to relate outcomes of the results to the effect of DM alone.  
255 In addition, while most of the patients were on anti-diabetic medications, the degree of diabetic  
256 control was not provided in the majority of studies. This highlights the challenges in studying the  
257 PK of anti-TB medications in a patient population with complex background. Importantly, there



258 was also high risk of measurement bias in all prospective studies except three where intensive  
259 sampling was conducted. As a result, evidence quality is influenced due to confounding and  
260 imprecision, limiting our practice recommendations. Overall, the existing body of literature  
261 examining PK of anti-TB medications among DM population is of medium quality.

262

## 263 **Discussion**

264

265 This systematic review provides a comprehensive account of the impact of DM on the PK of anti-  
266 TB medications. Our findings suggest that the limited available evidence to date is highly variable.  
267 While some studies showed lower plasma concentrations of TB medications among DM patients,  
268 we observed high variability in findings and significant heterogeneity among studies including  
269 study design and differences in demographics. Therefore, no recommendation can be made.

270

271 There may be several reasons to explain this heterogeneity. Firstly, there were significant  
272 demographic differences including weight, age and DM definitions. Increased body surface area  
273 distribution and delayed drug absorption due to DM related gastroparesis and changes in  
274 expression of enzymes involved in metabolism [49, 50] are major factors that may contribute to  
275 altered PK [15, 16]. DM patients had higher weight and/or BMI compared to nondiabetic patients  
276 and some studies demonstrated a negative association between weight and plasma  
277 concentrations. The only study that matched based on weight (within 5 kg) [38] found no  
278 significant difference of RIF plasma concentrations between groups. However, matching weight is  
279 unlikely to eliminate potential biases as DM participants continued to receive capped dosing  
280 despite weight differences and were also generally older than non-DM controls.

281

282 Unclear DM definitions may also explain the variability. In many studies DM diagnosis was based  
283 on self-report. This is specifically important as self-reporting may not be accurate and secondly, TB  
284 could lead to stress-induced hyperglycaemia, which resolves after TB treatment [51]. Screening  
285 DM at the time of TB diagnosis may result in some with transient hyperglycaemia being identified  
286 as DM. Therefore, a standard measure of DM consistently defined and reported in PK studies in  
287 line with the UNION criteria [52] would facilitate a better assessment of the plasma  
288 concentrations [53]. Nevertheless, patients with transient hyperglycaemia may also be at risk of  
289 lower plasma concentrations. For instance, in a study from Uganda, FPG was inversely correlated

290 with RIF AUC<sub>0-24h</sub> [54]. In addition, quality of diabetes control or treatment was poorly reported in  
291 most studies, which may have influenced the results.

292

293 PK sampling methodology and analysis varied widely. Studies with a single 2 hr sampling point  
294 assume T<sub>max</sub> to occur at 2 hrs (C<sub>max</sub>). As T<sub>max</sub> was longer for rifampicin in some studies, studies  
295 without intensive sampling may not accurately capture the C<sub>max</sub>. Notably, 3 studies with intensive  
296 sampling [31, 32, 38] showed no differences in rifampicin or pyrazinamide C<sub>max</sub>, but a significant  
297 difference in isoniazid C<sub>max</sub> (27). However, it is important to note T<sub>max</sub> is highly variable for RIF in  
298 general [55]

299

300 Particularly affecting the isoniazid studies, dosing differed markedly, with 4 out of 9 papers using  
301 600 mg 3 times/week, which is no longer a recommended dosing, making the comparison  
302 between the studies and the generalisation of the results more difficult. Only four out of 9 studies  
303 made any assessment of NAT2 acetylator status. As this is recognised as a key variable in isoniazid  
304 PK, this is likely to confound any other comparison of variables [56].

305

306 Plasma concentrations of TB medications may affect the clinical outcome. Zheng et al [57] showed  
307 an association between plasma concentrations of first line anti-TB drugs and culture conversion  
308 and clinical outcomes and Alfarisi et al. [21] demonstrated a positive association between time to  
309 culture conversion and INH and RIF concentrations and negatively association with PZA levels in  
310 DM patients. In another retrospective study, where all DM patients underwent TDM and dose  
311 adjustment accordingly, time to culture conversion improved significantly greater among DM  
312 patients with the post-intervention group that converted on average 19 days earlier [58].

313

314 We identified another systematic review assessing the impact of DM on the PK of rifampicin  
315 among TB patients [59]. The review included studies published up until September 2020 and  
316 identified seven studies from which pooled estimates were calculated. The same authors updated  
317 their systematic review including studies with C<sub>max</sub> at 2hr [60], and identified 17 studies reporting  
318 RIF plasma concentrations. Our review considers studies published up to July 2023 with a  
319 comprehensive systematic search; therefore, we were able to identify 16 papers assessing the PK  
320 of RIF.

321

322 To our knowledge, this is the first review to comprehensively examine the impact of DM on the PK  
323 of TB drugs. Our study has limitations. Firstly, we identified a limited number of PK studies among  
324 DM patients despite a comprehensive literature search. Secondly, due to the substantial study  
325 heterogeneity we were unable to pool data. Finally, we did not include general PK studies  
326 reporting on TB-DM patients as a subgroup as detailed and comparative PK parameters for DM vs  
327 non-DM patient populations weren't available.

328

329 This review provides detailed understanding about the evidence available so far on PK of anti-TB  
330 drugs in patients with DM. There is some evidence that PK, especially among DM patients, may  
331 have clinical relevance in terms of MIC and culture conversion. However, significant heterogeneity  
332 observed in studies and the scarcity of data on clinical outcomes, it is challenging to make  
333 recommendations about dosing in the TB-DM population. Given the relationship of delayed  
334 culture conversion and relapse, clinical outcomes should be explored in future PK studies. In order  
335 to achieve definitive answers for PK in DM population, we recommend important considerations  
336 as in **Table 6**. Until we have further information to guide the management of TB-DM patients,  
337 TDM and dose adjustment may be beneficial in patients with DM.

338

### 339 **Acknowledgements**

340 This work was supported by the Chief Scientist Office (CAF/20/03) and British Infection Association  
341 (Grant/2022/SPG/MC) received by MC.

342

### 343 **Author contributions**

344 MC and SHG conceptualized the scope of the review. MC and AS pulled the data from selected  
345 papers. All authors contributed to the final version of the manuscript and approved it for  
346 publication.

347

### 348 **Declaration of Interests**

349 No conflict of interests reported.

350

351 **References:**

352

- 353 1. WHO. World Health Organization, Global tuberculosis report 2022  
354 . Available at: <https://www.who.int/publications/i/item/9789240061729>.
- 355 2. Koesoemadinata RC, McAllister SM, Soetedjo NNM, et al. Latent TB infection and  
356 pulmonary TB disease among patients with diabetes mellitus in Bandung, Indonesia. *Trans*  
357 *R Soc Trop Med Hyg* **2017**; 111(2): 81-9.
- 358 3. Foe-Essomba JR, Kenmoe S, Tchatchouang S, et al. Diabetes mellitus and tuberculosis, a  
359 systematic review and meta-analysis with sensitivity analysis for studies comparable for  
360 confounders. *PLoS One* **2021**; 16(12): e0261246.
- 361 4. Al-Rifai RH, Pearson F, Critchley JA, Abu-Raddad LJ. Association between diabetes  
362 mellitus and active tuberculosis: A systematic review and meta-analysis. *PLoS One* **2017**;  
363 12(11): e0187967.
- 364 5. Baker MA, Harries AD, Jeon CY, et al. The impact of diabetes on tuberculosis treatment  
365 outcomes: a systematic review. *BMC Med* **2011**; 9: 81.
- 366 6. Salindri AD, Kipiani M, Kempker RR, et al. Diabetes Reduces the Rate of Sputum Culture  
367 Conversion in Patients With Newly Diagnosed Multidrug-Resistant Tuberculosis. *Open*  
368 *Forum Infect Dis* **2016**; 3(3): ofw126.
- 369 7. Huangfu P, Ugarte-Gil C, Golub J, Pearson F, Critchley J. The effects of diabetes on  
370 tuberculosis treatment outcomes: an updated systematic review and meta-analysis. *Int J*  
371 *Tuberc Lung Dis* **2019**; 23(7): 783-96.
- 372 8. Dong Z, Shi J, Dorhoi A, et al. Hemostasis and Lipoprotein Indices Signify Exacerbated  
373 Lung Injury in TB With Diabetes Comorbidity. *Chest* **2018**; 153(5): 1187-200.
- 374 9. Cho NH, Shaw JE, Karuranga S, et al. IDF Diabetes Atlas: Global estimates of diabetes  
375 prevalence for 2017 and projections for 2045. *Diabetes Res Clin Pract* **2018**; 138: 271-81.
- 376 10. Collaboration NCDRF. Worldwide trends in diabetes since 1980: a pooled analysis of 751  
377 population-based studies with 4.4 million participants. *Lancet* **2016**; 387(10027): 1513-30.
- 378 11. Noubiap JJ, Nansseu JR, Nyaga UF, et al. Global prevalence of diabetes in active  
379 tuberculosis: a systematic review and meta-analysis of data from 2.3 million patients with  
380 tuberculosis. *Lancet Glob Health* **2019**; 7(4): e448-e60.
- 381 12. Pan SC, Ku CC, Kao D, Ezzati M, Fang CT, Lin HH. Effect of diabetes on tuberculosis  
382 control in 13 countries with high tuberculosis: a modelling study. *Lancet Diabetes*  
383 *Endocrinol* **2015**; 3(5): 323-30.
- 384 13. Harries AD, Kumar AM, Satyanarayana S, et al. Addressing diabetes mellitus as part of the  
385 strategy for ending TB. *Trans R Soc Trop Med Hyg* **2016**; 110(3): 173-9.
- 386 14. WHO. Integrated care for tuberculosis (TB) and diabetes mellitus (DM) comorbidity in  
387 Asian countries: health system challenges and opportunities  
388 , **2022**.
- 389 15. Dostalek M, Akhlaghi F, Puzanovova M. Effect of diabetes mellitus on pharmacokinetic and  
390 pharmacodynamic properties of drugs. *Clin Pharmacokinet* **2012**; 51(8): 481-99.
- 391 16. Gwilt PR, Nahhas RR, Tracewell WG. The effects of diabetes mellitus on pharmacokinetics  
392 and pharmacodynamics in humans. *Clin Pharmacokinet* **1991**; 20(6): 477-90.
- 393 17. Gillespie SH. Evolution of drug resistance in *Mycobacterium tuberculosis*: clinical and  
394 molecular perspective. *Antimicrob Agents Chemother* **2002**; 46(2): 267-74.
- 395 18. Sterne JA, Hernan MA, Reeves BC, et al. ROBINS-I: a tool for assessing risk of bias in  
396 non-randomised studies of interventions. *BMJ* **2016**; 355: i4919.
- 397 19. Gafar F, Wasmann RE, McIlleron HM, et al. Global estimates and determinants of  
398 antituberculosis drug pharmacokinetics in children and adolescents: a systematic review and  
399 individual patient data meta-analysis. *Eur Respir J* **2023**; 61(3).
- 400 20. Campbell M, McKenzie JE, Sowden A, et al. Synthesis without meta-analysis (SWiM) in  
401 systematic reviews: reporting guideline. *BMJ* **2020**; 368: l6890.

- 402 21. Alfarisi O, Mave V, Gaikwad S, et al. Effect of Diabetes Mellitus on the Pharmacokinetics  
403 and Pharmacodynamics of Tuberculosis Treatment. *Antimicrob Agents Chemother* **2018**;  
404 62(11): 11.
- 405 22. Babalik A, Ulus IH, Bakirci N, et al. Plasma concentrations of isoniazid and rifampin are  
406 decreased in adult pulmonary tuberculosis patients with diabetes mellitus. *Antimicrob*  
407 *Agents Chemother* **2013**; 57(11): 5740-2.
- 408 23. Chang MJ, Chae JW, Yun HY, et al. Effects of type 2 diabetes mellitus on the population  
409 pharmacokinetics of rifampin in tuberculosis patients. *Tuberculosis (Edinb)* **2015**; 95(1): 54-  
410 9.
- 411 24. Dekkers BGJ, Bolhuis MS, Beek LT, et al. Reduced moxifloxacin exposure in patients with  
412 tuberculosis and diabetes. *European Respiratory Journal* **2019**; 54(3) (no pagination).
- 413 25. Fonseca AAD, Pinto ACG, Paixao TPD, Alberio CAA, Vieira JLF. Can diabetes mellitus  
414 modify the plasma concentrations of rifampicin in patients under treatment for tuberculosis?  
415 *Brazilian Journal of Infectious Diseases* **2020**; 24(4): 352-5.
- 416 26. Galvao FES, Fonseca AAD, Pinto ACG, da Paixao TP, Alberio CAA, Vieira JLF. No  
417 significant influence of diabetic mellitus on isoniazid plasma levels in patients under  
418 treatment for tuberculosis. *Infectious Diseases* **2020**; 52(8): 577-80.
- 419 27. Hemanth Kumar AK, Kannan T, Chandrasekaran V, et al. Pharmacokinetics of thrice-  
420 weekly rifampicin, isoniazid and pyrazinamide in adult tuberculosis patients in India. *Int J*  
421 *Tuberc Lung Dis* **2016**; 20(9): 1236-41.
- 422 28. Heysell SK, Moore JL, Keller SJ, Houpt ER. Therapeutic drug monitoring for slow response  
423 to tuberculosis treatment in a state control program, Virginia, USA. *Emerg Infect Dis* **2010**;  
424 16(10): 1546-53.
- 425 29. Kim R, Jayanti RP, Kim HK, et al. Development of a population pharmacokinetic model of  
426 pyrazinamide to guide personalized therapy: impacts of geriatric and diabetes mellitus on  
427 clearance. *Front Pharmacol* **2023**; 14 (no pagination): 1116226.
- 428 30. Kumar AK, Chandrasekaran V, Kannan T, et al. Anti-tuberculosis drug concentrations in  
429 tuberculosis patients with and without diabetes mellitus. *Eur J Clin Pharmacol* **2017**; 73(1):  
430 65-70.
- 431 31. Medellin-Garibay SE, Cortez-Espinosa N, Milan-Segovia RC, et al. Clinical  
432 Pharmacokinetics of Rifampin in Patients with Tuberculosis and Type 2 Diabetes Mellitus:  
433 Association with Biochemical and Immunological Parameters. *Antimicrob Agents*  
434 *Chemother* **2015**; 59(12): 7707-14.
- 435 32. Mtabho CM, Semvua HH, van den Boogaard J, et al. Effect of diabetes mellitus on TB drug  
436 concentrations in Tanzanian patients. *J Antimicrob Chemother* **2019**; 74(12): 3537-45.
- 437 33. Nijland HM, Ruslami R, Stalenhoef JE, et al. Exposure to rifampicin is strongly reduced in  
438 patients with tuberculosis and type 2 diabetes. *Clin Infect Dis* **2006**; 43(7): 848-54.
- 439 34. Perea-Jacobo R, Muniz-Salazar R, Laniado-Laborin R, Cabello-Pasini A, Zenteno-Cuevas  
440 R, Ochoa-Teran A. Rifampin pharmacokinetics in tuberculosis-diabetes mellitus patients: a  
441 pilot study from Baja California, Mexico. *Int J Tuberc Lung Dis* **2019**; 23(9): 1012-6.
- 442 35. Ramachandran G, Chandrasekaran P, Gaikwad S, et al. Subtherapeutic rifampicin  
443 concentration is associated with unfavorable tuberculosis treatment outcomes. *Clin Infect*  
444 *Dis* **2020**; 70(7): 1463-70.
- 445 36. Requena-Mendez A, Davies G, Ardrey A, et al. Pharmacokinetics of rifampin in Peruvian  
446 tuberculosis patients with and without comorbid diabetes or HIV. *Antimicrob Agents*  
447 *Chemother* **2012**; 56(5): 2357-63.
- 448 37. Requena-Mendez A, Davies G, Waterhouse D, et al. Effects of dosage, comorbidities, and  
449 food on isoniazid pharmacokinetics in Peruvian tuberculosis patients. *Antimicrob Agents*  
450 *Chemother* **2014**; 58(12): 7164-70.
- 451 38. Ruslami R, Nijland HM, Adhiarta IG, et al. Pharmacokinetics of antituberculosis drugs in  
452 pulmonary tuberculosis patients with type 2 diabetes. *Antimicrob Agents Chemother* **2010**;  
453 54(3): 1068-74.

- 454 39. Samuel Gideon George P, Saranya P. Effect of patient-specific variables on rifampicin peak  
455 serum concentration. *Drug Invention Today* **2018**; 10(3): 290-6.
- 456 40. Saranya P, Parthasarathy V, Hariprasad B, Shobha Rani H. Effect of diabetes mellitus on  
457 rifampicin peak serum concentration. *International Journal of Pharmacy and Pharmaceutical*  
458 *Sciences* **2016**; 8(10): 149-52.
- 459 41. Zhu H, Guo SC, Liu ZQ, et al. Therapeutic drug monitoring of cycloserine and linezolid  
460 during anti-tuberculosis treatment in Beijing, China. *Int J Tuberc Lung Dis* **2018**; 22(8):  
461 931-6.
- 462 42. Chang MJ, Shin W, Song J, et al. The pharmacokinetics of four standard anti-tuberculosis  
463 drugs in tuberculosis patients with diabetes mellitus. *Respirology* **2009**; 3): A231.
- 464 43. Mtabho C, Semvua H, Kibiki G, Tostmann A, Aarnoutse R. The effect of diabetes mellitus  
465 on the pharmacokinetics of tuberculosis drugs in Tanzanian patients. *Tropical Medicine and*  
466 *International Health* **2015**; 1): 23.
- 467 44. Nijland H, Ruslami R, Stalenhoef J, et al. Exposure to rifampicin is reduced by 53% in  
468 tuberculosis patients with Diabetes Mellitus. *Br J Clin Pharmacol* **2006**; 62(6): 730-.
- 469 45. Mendez AR, Moore DAJ, Davies G. Improving management of TB in the tropics  
470 Rifampicin pharmacokinetics in peruvian tuberculosis patients with and without co-morbid  
471 diabetes or HIV. *Tropical Medicine and International Health* **2011**; 1): 62.
- 472 46. Kim R, Jayanti R, Jang T, et al. Development of Population Pharm Aco Kin Etics Model of  
473 Pyrazinamide and Optimal Dose Recommendation for Elderly with Diabetes Mellitus in  
474 Korean Tuberculosis Patients. *Clinical Pharmacology and Therapeutics* **2023**;  
475 113(Supplement 1)(S1): S94.
- 476 47. Christopher DJ, Jedidiah D, Isaac B, Mathew B, Winston B. Anti-tubercular drug  
477 concentrations in pulmonary tuberculosis patients-diabetic vs non-diabetic groups. *European*  
478 *Respiratory Journal Conference: 29th International Congress of the European Respiratory*  
479 *Society, ERS Madrid Spain* **2019**; 54(Supplement 63).
- 480 48. Peloquin CA, Velasquez GE, Lecca L, et al. Pharmacokinetic Evidence from the HIRIF  
481 Trial To Support Increased Doses of Rifampin for Tuberculosis. *Antimicrob Agents*  
482 *Chemother* **2017**; 61(8).
- 483 49. Kuppusamy UR, Indran M, Rokiah P. Glycaemic control in relation to xanthine oxidase and  
484 antioxidant indices in Malaysian Type 2 diabetes patients. *Diabet Med* **2005**; 22(10): 1343-  
485 6.
- 486 50. Dash RP, Ellendula B, Agarwal M, Nivsarkar M. Increased intestinal P-glycoprotein  
487 expression and activity with progression of diabetes and its modulation by epigallocatechin-  
488 3-gallate: Evidence from pharmacokinetic studies. *Eur J Pharmacol* **2015**; 767: 67-76.
- 489 51. Ugarte-Gil C, Alisjahbana B, Ronacher K, et al. Diabetes mellitus among pulmonary  
490 tuberculosis patients from four TB-endemic countries: the TANDEM study. *Clin Infect Dis*  
491 **2019**.
- 492 52. Lin Yan ADH, Ajay M V Kumar, Julia A Critchley, Reinout van Crevel, Philip Owiti, Riitta  
493 A Dlodlo, Anders Dejgaard. MANAGEMENT OF DIABETES MELLITUS-  
494 TUBERCULOSIS - A GUIDE TO THE ESSENTIAL PRACTICE  
495 , **2019**.
- 496 53. LinY HAD, Kumar A MV, Critchley J A, van Crevel R, Owiti P, Dlodlo R A, Dejgaard A.  
497 Management of diabetes mellitus-tuberculosis: a guide to the essential practice. *International*  
498 *Union Against Tuberculosis and Lung Disease* **2019**.
- 499 54. Wyrsh F, von Braun A, Sekaggya-Wiltshire C, et al. Hyperglycaemia and  
500 pharmacokinetics of rifampicin/isoniazid among TB-HIV co-infected patients in Kampala,  
501 Uganda. *Int J Tuberc Lung Dis* **2020**; 24(12): 1234-40.
- 502 55. Sturkenboom MG, Mulder LW, de Jager A, et al. Pharmacokinetic Modeling and Optimal  
503 Sampling Strategies for Therapeutic Drug Monitoring of Rifampin in Patients with  
504 Tuberculosis. *Antimicrob Agents Chemother* **2015**; 59(8): 4907-13.

- 505 56. Hong BL, D'Cunha R, Li P, et al. A Systematic Review and Meta-analysis of Isoniazid  
506 Pharmacokinetics in Healthy Volunteers and Patients with Tuberculosis. *Clin Ther* **2020**;  
507 42(11): e220-e41.
- 508 57. Zheng X, Bao Z, Forsman LD, et al. Drug Exposure and Minimum Inhibitory Concentration  
509 Predict Pulmonary Tuberculosis Treatment Response. *Clin Infect Dis* **2021**; 73(9): e3520-  
510 e8.
- 511 58. Alkabab Y, Keller S, Dodge D, Houtp E, Staley D, Heysell S. Early interventions for  
512 diabetes related tuberculosis associate with hastened sputum microbiological clearance in  
513 Virginia, USA. *BMC Infect Dis* **2017**; 17(1): 125.
- 514 59. Metwally AS, El-Sheikh SMA, Galal AAA. The impact of diabetes mellitus on the  
515 pharmacokinetics of rifampicin among tuberculosis patients: A systematic review and meta-  
516 analysis study. *Diabetes Metab Syndr* **2022**; 16(2): 102410.
- 517 60. El-Sheikh SMA, Metwally AS, Galal AAA. Impact of diabetes mellitus on rifampicin's  
518 plasma concentration and bioavailability in patients with tuberculosis: A systematic review  
519 and meta-analysis study. *Therapie* **2023**; 78(3): 313-24.
- 520

Figure 1. Flowchart describing study selection

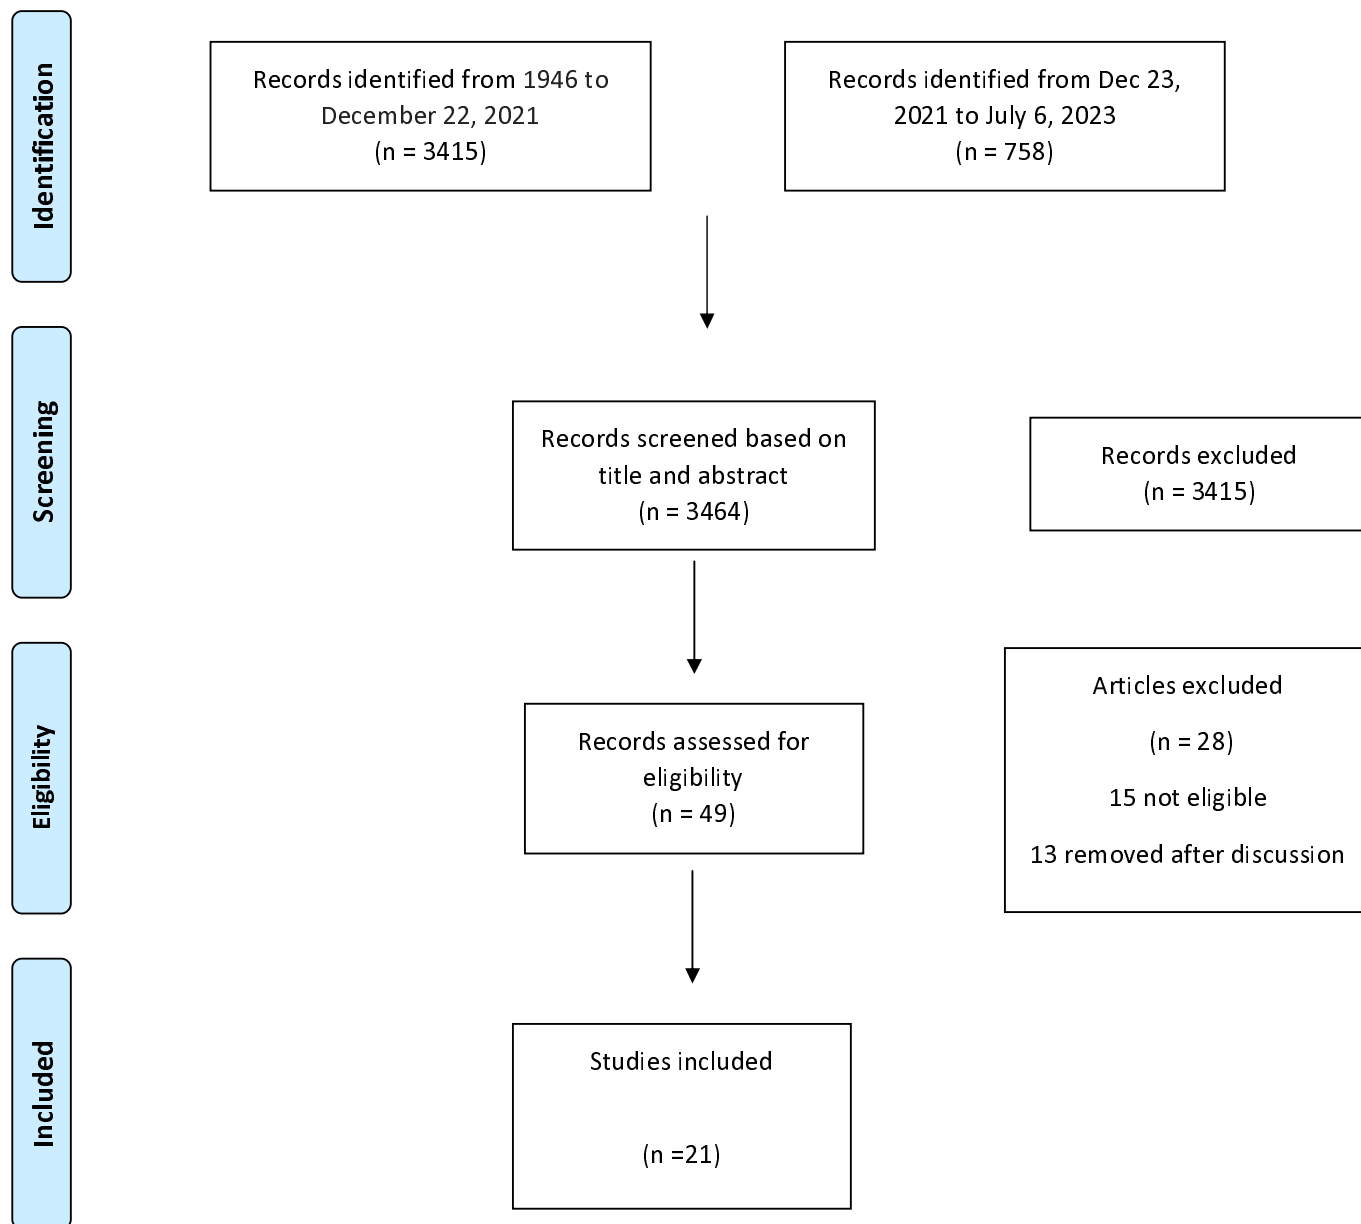

From: Moher D, Liberati A, Tetzlaff J, Altman DG, The PRISMA Group (2009). Preferred Reporting Items for Systematic Reviews and Meta-Analyses: The PRISMA Statement. PLoS Med 6(6): e1000097. doi:10.1371/journal.pmed1000097

For more information, visit [www.prisma-statement.org](http://www.prisma-statement.org).



Rifampicin

medRxiv preprint doi: <https://doi.org/10.1101/2023.08.29.23294656>; this version posted August 29, 2023. The copyright holder for this preprint (which was not certified by peer review) is the author/funder, who has granted medRxiv a license to display the preprint in perpetuity. It is made available under a CC-BY-NC 4.0 International license.

| Study                 | Country   | Study Design                                                                                                  | Number (DM/Total)                | Age                                                                | Sex                                            | Weight                                                                                                  | Sampling    | TB Treatment Phase                                                                     | Dose (mg)                         | Regimen                                                                                                                                                                                  | TB Diagnosis                                            | DM Diagnosis                                                 | C <sub>max</sub>                                                                                                                                                                                             | AUC                                                                                                  | T <sub>max</sub> (Hrs)                                                                                  | DM Control                                     | DM Treatment                                                                                                                                                                                                                                                                                          | Other PK                                                                                                                                                                                                                                                          |
|-----------------------|-----------|---------------------------------------------------------------------------------------------------------------|----------------------------------|--------------------------------------------------------------------|------------------------------------------------|---------------------------------------------------------------------------------------------------------|-------------|----------------------------------------------------------------------------------------|-----------------------------------|------------------------------------------------------------------------------------------------------------------------------------------------------------------------------------------|---------------------------------------------------------|--------------------------------------------------------------|--------------------------------------------------------------------------------------------------------------------------------------------------------------------------------------------------------------|------------------------------------------------------------------------------------------------------|---------------------------------------------------------------------------------------------------------|------------------------------------------------|-------------------------------------------------------------------------------------------------------------------------------------------------------------------------------------------------------------------------------------------------------------------------------------------------------|-------------------------------------------------------------------------------------------------------------------------------------------------------------------------------------------------------------------------------------------------------------------|
| Nijland 2006          | Indonesia | Prospective PK                                                                                                | 17/34                            | Matched Median 50 (DM) v 48 (nonDM)                                | Matched (59% male)                             | Significantly higher in DM group (median kg 55.6 versus 46.2 p0.01)                                     | 2/4/6 hr    | Continuation                                                                           | 450                               | Rifampicin 450mg Isoniazid 300mg 3x week                                                                                                                                                 | Pulmonary Microbiologically confirmed                   | Known Screening via FBGx2                                    | mg/L Significantly lower in DM group Mean 3.49 (2.1-5.6) DM v 95% CI) DM v (5.6 – 10.1) nonDM p0.000                                                                                                         | 0-6h mg x h/L Significantly lower in DM group 12.3 (8.0-24.2) DM v 25.9 (21.4-40.2) nonDM p0.003     | T <sub>max</sub> longer in DM group, but not significant Median 4 (2-6 range) DM v 2 (2-4) nonDM, p0.52 | Median HbA1c 9.85% Median FBG 9.3mmol/L        | 71% on oral antidiabetic meds. No metformin or insulin                                                                                                                                                                                                                                                | Body weight, raised FBG, DM inversely correlated with AUC/C <sub>max</sub> on MV analysis                                                                                                                                                                         |
| Ruslami 2010          | Indonesia | Prospective PK                                                                                                | 17/34                            | Significantly higher DM group Mean 47 (DM) versus 35 (nonDM) p0.00 | Matched (42% male)                             | Matched (within 5kg) (mean 47.3kg both groups)                                                          | Intensive   | Intensive                                                                              | 450                               | Rifampicin 450mg Isoniazid 300mg Pyrazinamide 1500mg Ethambutol 750mg Daily                                                                                                              | Pulmonary                                               | Known (60%) Screening via WHO criteria (40%)                 | mg/L No difference Mean 10.5 (7.3-12.3) 95% CI) DM v 9.6 (8.4-11.1) nonDM p0.000                                                                                                                             | 0-24 mg x h/L No difference Mean 49.0 (40.9-58.7) DM v 50.6 (42.9-59.8) nonDM p0.81                  | No difference Median 2 (0.5-4 range) DM v 2.5 (1-4) nonDM p0.28                                         | Mean HbA1c 11.1% Median FBG 16.6mmol/L         | None                                                                                                                                                                                                                                                                                                  | No correlation between FBG and AUC/C <sub>max</sub> . 10 DM cases treated with insulin to achieve glycaemic control, with PK repeated 6 weeks later – non-significant change in AUC/other PK Has further detailed PK if needed                                    |
| Heysell 2010          | USA       | Retrospective cohort using routinely collected data TDM carried out for patients defined as 'slow to respond' | 17/42                            | 36% 18-39, 36% 40-54, 28% >65 Total group – no breakdown for DM    | 67% male of total group (nil breakdown for DM) | Unknown                                                                                                 | 2 hr        | Unknown                                                                                | Unknown                           | Rifampicin Isoniazid Pyrazinamide Ethambutol Some daily, some 2x week R/H                                                                                                                | Pulmonary or extrapulmonary Microbiologically confirmed | Unknown                                                      | C <sub>max</sub> defined as sample Normal range 10-20 µg/mL DM significantly associated with low 2hr R Low R level DM, 41% non-normal R level 20% DM, 80% nonDM. OR (1.4-23.1) 95% CI) p0.01                 | NA                                                                                                   | NA                                                                                                      | Unknown                                        | Unknown                                                                                                                                                                                                                                                                                               | No quantitative C <sub>max</sub> data available comparing DM and non-DM groups                                                                                                                                                                                    |
| Requena-Mendez 2012   | Peru      | Prospective comparing DM group, HIV group and non-DM/HIV group                                                | 26/105 (29 HIV, 50 nonDM/nonHIV) | Significantly higher in DM group (51.3 versus 31.1 nonDM/HIV)      | 65.4% male DM group, 48.0% nonDM/HIV           | BMI reported rather than weight. Significantly higher in DM group (27.5 versus 23.3 nonDM/nonHIV group) | 2hr, 6hrs   | 1 time point for each case, 61/105 intensive, 44/105 continuous (50% each in DM group) | 10mg/kg to maximum 600            | Rest of regimen not stated x6/week dosing in intensive, x2/week in continuation                                                                                                          | 87% pulmonary, 77/105 microbiologically confirmed       | Known                                                        | mg/L Cmax taken at highest of 2hr, 6hr sample No difference in DM group Cmax mean at 2hrs – 5.1 DM non-DM (p0.9) Cmax mean at 6hrs – 3.4 DM non-DM (p0.2) No association between Cmax and DM on MVA analysis | NA                                                                                                   | 6hrs rather than 2hrs in 62.2% cases (no association with DM)                                           | Median HbA1c 8.3%                              | Unknown                                                                                                                                                                                                                                                                                               | Majority of patients with concentrations lower than therapeutic range – no particular association with DM.                                                                                                                                                        |
| Babalik 2013          | Turkey    | Prospective                                                                                                   | 14/70                            | Significantly higher in DM group (56.5yrs versus 39.0, p0.001)     | 86% DM group male, versus 61% non-DM (p0.116)  | DM group significantly heavier (68.7kg versus 56.7kg, p0.001)                                           | 2hr4        | Intensive at 14 and 30 days after starting treatment                                   | 600                               | 600 Rifampicin 300 Isoniazid 1500 Pyrazinamide 1000 Ethambutol Daily                                                                                                                     | Pulmonary, 89% culture confirmed                        | Known                                                        | C2hr only Significantly lower in DM group at D14 and D30 (day 14 mean 5.1 µg/mL nonDM, 2.9 DM, p<0.05, day 30 mean 5.4 nonDM versus 3.2 DM, p<0.05)                                                          | NA                                                                                                   | NA                                                                                                      | Mean HbA1c 6.1% (only included if HbA1c <6.5%) | On treatment                                                                                                                                                                                                                                                                                          | Concentration inversely correlated with weight                                                                                                                                                                                                                    |
| Chang 2015            | Korea     | Prospective with analysis using population PK                                                                 | 21/54                            | Median 55 (20-92 range) for whole group, no breakdown of DM group  | 63% male whole group, no breakdown DM group    | Mean 53.96kg whole group, no breakdown DM group                                                         | 1,2,4,6hrs  | Intensive                                                                              | 10 mg/kg (up to 450 mg or 600 mg) | Rifampicin 10 mg/kg (max 450 mg or 600 mg) Isoniazid 5 mg/kg (max 300 mg or 400 mg) Pyrazinamide 15-30 mg/kg (max 1500 mg) Ethambutol 15-20 mg/kg (max 800 mg, 1000 mg or 1200 mg) Daily | Combination clinical/radiological/microbiological       | FBG >126 mg/dl or post-prandial glucose levels >200 mg/dl    | NA                                                                                                                                                                                                           | NA                                                                                                   | Mean fasting blood glucose 154.8 mg/dL                                                                  | Unknown                                        | ka (absorption rate constant) significantly increased in DM group (2.81 hr <sup>-1</sup> , versus 1.33, p<0.05) Vd (volume of distribution) significantly increased in DM group (76.3L versus 46.1, p<0.05) Infer from increased Vd in DM group, that plasma concentration would be lower in DM group |                                                                                                                                                                                                                                                                   |
| Medellin-Garibay 2015 | Mexico    | Prospective intensive PK with additional immunology study                                                     | 24/48                            | DM group older Median 52.2 versus 37.3                             | Matched                                        | Higher median BMI in DM group (23.3 versus 21.6)                                                        | Intensive   | Intensive                                                                              | 450 if <50kg 600 if >50kg         | Rifater 450/600 Rifampicin 225/300 Isoniazid 1200/1600 Pyrazinamide (Weight </>50kg) per tablet                                                                                          | Microbiologically confirmed                             | Known or screened: fasting glucose >126 mg/dl or HbA1c >6.5% | Mg/L No significant difference Median Cmax DM group 12.10 ± 5.1 versus 11.41 ± 3.8, p0.44                                                                                                                    | AUC 0-24 (mg.hr.L) No significant difference Median DM group 97.52 ± 36.7 versus 82.60 ± 35.5, p0.17 | Significantly increased in Dm group Median DM 2.98 ± 1.9 versus 2.32 ± 1.4                              | Median HbA1c 9.02%                             | 63% on treatment                                                                                                                                                                                                                                                                                      | No difference in ka or VD between TB and TBDM group in 1 compartment model, but reduced clearance in Dm group Tlag significantly increased in Dm group Tlag positively correlated with increased HbA1c, Cmax negatively correlated with increased fasting glucose |
| Hemant Kumar 2016     | India     | Prospective PK to assess x3 weekly regimen, with                                                              | 23/101                           | Median age 34 (no breakdown of Dm group)                           | 65.3% male (no breakdown of Dm group)          | BMI significantly higher in Dm group (20.3 versus 18.4, p0.021)                                         | 2,4,6,8 hrs | Intensive                                                                              | 450 (600 if >60kg)                | Rifampicin 450/600 Isoniazid 600 Pyrazinamide 1500 Ethambutol 1200                                                                                                                       | Pulmonary or EP                                         | Known or random blood glucose >200 µg/mL                     | µg/mL No significant difference Median DM 5.7                                                                                                                                                                | AUC 0-8 µg/ml.hr No significant difference Median DM 27.6                                            | 2hrs for whole group – no analysis comparing DM                                                         | Unknown                                        | Unknown                                                                                                                                                                                                                                                                                               | DM not significant as a factor on multivariate analysis (Cmax and AUC)                                                                                                                                                                                            |

Rifampicin

|                           |          | DM as one covariate                                                                        |          |                                                                |                                                                |                                                                                      |             |                                  |                           | +/- Streptomycin 750 3x weekly                                                                                           |                                              |                                                                                                          | (4.2 – 7.1) versus nonDM 4.9 (3.6-6.6), p0.24                                                                                                                       | (22.0-37.3) versus nonDM 27.9 (20.0-32.7), p0.35                                                                                               | to nonDM                                                               |                                         |                                         |                                                               |  |
|---------------------------|----------|--------------------------------------------------------------------------------------------|----------|----------------------------------------------------------------|----------------------------------------------------------------|--------------------------------------------------------------------------------------|-------------|----------------------------------|---------------------------|--------------------------------------------------------------------------------------------------------------------------|----------------------------------------------|----------------------------------------------------------------------------------------------------------|---------------------------------------------------------------------------------------------------------------------------------------------------------------------|------------------------------------------------------------------------------------------------------------------------------------------------|------------------------------------------------------------------------|-----------------------------------------|-----------------------------------------|---------------------------------------------------------------|--|
| Saranya 2016              | India    | Prospective PK                                                                             | 20/45    | DM group older<br>Mean 46.6 v 42.4                             | 68.9% male (no breakdown of DM group)                          | Weight not significantly different between DM and nonDM (p=0.544), 89.9% total <50kg | 2hr         | Not specified                    | Not specified             | Not specified                                                                                                            | Pulmonary                                    | Unknown                                                                                                  | C2hr only<br>Significantly lower in DM group<br>No absolute numbers given                                                                                           | NA                                                                                                                                             | NA                                                                     | Unknown                                 | 83% on insulin and metformin            | Cmax negatively correlated with RBG                           |  |
| Kumar 2017                | India    | Prospective multicentre                                                                    | 452/1912 | DM significantly older (median age DM 48yr versus 34, p<0.001) | Significantly more men in DM group (73.5% versus 65.7, p0.002) | BMI significantly higher in DM group (20.4 versus 18.2, p<0.001)                     | 2hr         | Intensive                        | 450 (600 if >60kg)        | Rifampicin 450/600 Isoniazid 600 Pyrazinamide 1500 Ethambutol 1200 +/- Streptomycin 750 3x weekly                        | Pulmonary or EP                              | Known or random blood glucose >200 µg/mL (16% new)                                                       | µg/mL<br>C2hr only<br>No significant difference<br>Median DM (0.6-5), nonDM (0.7-4.9)                                                                               | NA                                                                                                                                             | NA                                                                     | Median random blood glucose 263.5 mg/dL | Majority of diabetes group on treatment |                                                               |  |
| Alfarisi 2018             | India    | Prospective cohort, both PK and PK-PD                                                      | 101/243  | DM significantly older (median age 48 versus 26, p<0.001)      | Significantly more men in DM group (77% versus 61%, p<0.001)   | Weight significantly increased in DM group (50.8kg versus 45kg, p<0.001)             | 0.5,2,6hrs  | x1 intensive<br>x1 continuation  | 450                       | Rifampicin 450 Isoniazid 600 Pyrazinamide 1500 Ethambutol 1200 3x weekly<br><br>Rif/so alone in continuation (3x weekly) | Pulmonary                                    | Known or HbA1c >6.5%, fasting blood glucose concentration >126 mg/dl, or random blood glucose >200 mg/dl | µg/mL<br>No significant difference<br>Intensive: mean DM 3.63, nonDM 4.32, p0.17<br>Continuation: mean DM 3.88, nonDM 2.98, p0.17                                   | AUC0-6 µg.hr/ml<br>No significant difference<br>Intensive: mean DM 12.19, nonDM 15.34, p0.11<br>Continuation: mean DM 14.56, nonDM 11.13 p0.14 | NA                                                                     | NA                                      | Median HbA1c at baseline 8.9%           | 44.6% on metformin                                            |  |
| Samuel Gideon George 2018 | India    | Prospective PK                                                                             | 24/60    | Mean 44.78yrs (no breakdown of DM group)                       | 71.7% male (no breakdown of DM group)                          | Weight significantly increased in DM group (mean 50.87kg versus 42.36kg, p<0.001)    | 2hr         | Intensive                        | 450/600 (?weight cut off) | Rifampicin 450/600 Isoniazid Pyrazinamide Ethambutol 3x weekly<br>Doses not specified                                    | Pulmonary, smear and radiologically positive | Not stated                                                                                               | µg/mL<br>C2hr only<br>Significantly lower in DM group<br>Mean DM 4.0 (SD 0.4), nonDM 4.7 (SD 0.4), p0.02                                                            | NA                                                                                                                                             | NA                                                                     | Unknown                                 | Unknown                                 | Cmax negatively correlated with RBG                           |  |
| Mtabho 2019               | Tanzania | Prospective PK                                                                             | 19/39    | DM significantly older (median age 50yrs versus 38, p0.001)    | No difference in groups (79% male in DM group versus 75%)      | No difference in weight (58kg DM versus 55% non, p0.258)                             | Intensive   | Intensive                        | 600 (>50kg), 450 (<50kg)  | Rifampicin 600/450 Isoniazid 300/225 Pyrazinamide 1600/1200 Ethambutol 1100/825<br>Weight cut off 50kg Daily             | Clinical/radiological/microbiological        | Known or fasting glucose >7mmol/L                                                                        | mg/L<br>No significant difference<br>Mean DM 20.7, nonDM (5.9-14.8) p0.001                                                                                          | AUC0-24 mg.h/L<br>Trend to lower in DM group but not significant<br>Mean DM 29.9 (6.4-69.7), nonDM 39.9 (27.4-68.3), p0.052                    | Significantly longer in DM<br>Median DM 2.1hrs versus 1.1hrs, p0.02    | Median HbA1c 111mmol/mol                | 84% on oral medications                 | Cmax/AUC not associated with fasting glucose or HbA1c results |  |
| Perea-Jacobo 2019         | Mexico   | Prospective PK                                                                             | 16/30    | DM significantly older (mean age 46.6yrs versus 37.2, p0.018)  | No difference between groups (75% male DM group versus 71%)    | No difference in BMI (Mean DM 23.6 versus 22.3, p0.323)                              | 2.5,6,24hrs | Intensive                        | 600                       | Rifampicin 600 Isoniazid 300 Pyrazinamide 1600 Ethambutol 1200 Daily                                                     | Pulmonary and extrapulm, micro confirmed     | Fasting glucose >126 mg/dl or HbA1c >6.5%                                                                | µg/mL<br>No significant difference<br>Mean DM 4.1 (3.0, nonDM 5.3), 3.8, p0.37                                                                                      | AUC0-6 mg.h/l<br>No significant difference<br>Mean DM 14.3 ± 7.5, nonDM 21.6 ± 16.3, p0.13                                                     | No significant difference<br>Mean DM 5.6 ± 7.3, nonDM 4.0 ± 6.1, p0.50 | Unknown                                 | 88% on treatment                        |                                                               |  |
| Fonseca 2020              | Brazil   | Prospective PK                                                                             | 26/62    | No difference (median 39yrs versus 44)                         | 100%                                                           | Weight significantly higher in DM group (Median 64kg versus 54kg)                    | 2hrs        | Intensive/<br>Continuation (D61) | 600                       | Rifampicin 600 Isoniazid 300 Pyrazinamide 1600 Ethambutol 1100 Daily<br>R/H only in continuation                         | Pulmonary, clinical, radio, micro            | Fasting glucose >126 mg/dl or HbA1c >6.5%                                                                | µg/mL<br>C2hr only<br>No significant difference<br>Median DM 6.8-9 range), nonDM 6.16 (3.0-14.2), p0.37                                                             | NA                                                                                                                                             | NA                                                                     | Median HbA1c 9.6%                       | 15% on treatment                        | No association between concentrations and HbA1c or FBG        |  |
| Ramachandran 2020         | India    | Prospective PK, specifically looking at association between C <sub>2hr</sub> and outcomes. | 113/404  | Median age 40, no breakdown of DM group                        | 64, no breakdown DM group                                      | BMI Median 17.8, no breakdown DM group                                               | 2hrs        | Intensive and Continuation       | 450/600 if >60kg          | R 450/600 H 600 Z 1500 E 1200 3x weekly<br>CP: R/H                                                                       | Pulmonary                                    | Known or HbA1c >6.5%, or RBG >200 mg/dl                                                                  | µg/mL<br>C <sub>2hr</sub><br>No significant difference<br>I: Median 3.64 (1.78-6.58 IQR) v 3.47 (1.33-6.40), p0.49<br>C: 5.91 (2.13-9.51) v 4.41 (1.65-7.46), p0.07 | NA                                                                                                                                             | NA                                                                     | Unknown                                 | Unknown                                 |                                                               |  |

medRxiv preprint doi: <https://doi.org/10.1101/2023.08.29.23294656>; this version posted August 29, 2023. The copyright holder for this preprint (which was not certified by peer review) is the author/funder, who has granted medRxiv a license to display the preprint in perpetuity. It is made available under a CC-BY-NC-ND 4.0 International license.



Pyrazinamide

| Study             | Country   | Study Design                                                                               | Number (DM/Total) | Age                                                                | Sex                                                            | Weight                                                                   | Sampling                                            | TB Treatment Phase                                   | Dose (mg)                 | Regimen                                                                                                                   | TB Diagnosis                          | DM Diagnosis                                                                                             | C <sub>max</sub>                                                                                                                                                 | AUC                                                                                                                                                                       | T <sub>max</sub> (Hrs)                                            | DM Control                                     | DM Treatment                            | Other PK                                                                                                                                                                                   |
|-------------------|-----------|--------------------------------------------------------------------------------------------|-------------------|--------------------------------------------------------------------|----------------------------------------------------------------|--------------------------------------------------------------------------|-----------------------------------------------------|------------------------------------------------------|---------------------------|---------------------------------------------------------------------------------------------------------------------------|---------------------------------------|----------------------------------------------------------------------------------------------------------|------------------------------------------------------------------------------------------------------------------------------------------------------------------|---------------------------------------------------------------------------------------------------------------------------------------------------------------------------|-------------------------------------------------------------------|------------------------------------------------|-----------------------------------------|--------------------------------------------------------------------------------------------------------------------------------------------------------------------------------------------|
| Ruslami 2010      | Indonesia | Prospective PK                                                                             | 18/36             | Significantly higher DM group Mean 47 (DM) versus 35 (nonDM) p0.00 | Matched (42% male)                                             | Matched (mean 47.3kg both groups)                                        | Intensive                                           | Intensive                                            | 1500                      | Rifampicin 450mg Isoniazid 300mg Pyrazinamide 1500mg Ethambutol 750mg                                                     | Pulmonary                             | Known (60%) Screening via WHO criteria (40%)                                                             | mg/L No difference Mean 45.5 (41.6-49.3 95% CI) DM v 47.0 (44.1-50.1) nonDM p0.47                                                                                | 0-24 mg x h/L No difference Mean 409 (369-455) DM v 468 (422-519) nonDM p0.07                                                                                             | No difference Median 1 (0.5-4 range) DM v 1.5 (0.5-6) nonDM p0.61 | Mean HbA1c 11.1% Median FBG 16.6mmol/L         | None                                    | No correlation between FBG and AUC/C <sub>max</sub> 10 DM cases treated with insulin to achieve glycaemic control, with PK repeated 6 weeks later – non significant change in AUC/other PK |
| Babalik 2013      | Turkey    | Prospective                                                                                | 14/70             | Significantly higher in DM group (56.5yrs versus 39.0, p0.001)     | 86% DM group male, versus 61% non-DM (p0.116)                  | DM group significantly heavier (68.7kg versus 56.7kg, p0.001)            | 2hr                                                 | Intensive at 14 and 30 days after starting treatment | 1500                      | 600 Rifampicin 300 Isoniazid 1500 Pyrazinamide 1000 Ethambutol Daily                                                      | Pulmonary, 89% culture confirmed      | Known                                                                                                    | C2hr only No significant difference at D1 and D30 (day 1 mean 23.4 µg/ml nonDM, 25.9 DM, p>0.05, day 30 27.9 nonDM versus 23.4 DM, p>0.05)                       | NA                                                                                                                                                                        | NA                                                                | Mean HbA1c 6.1% (only included if HbA1c <6.5%) | On treatment                            |                                                                                                                                                                                            |
| Hemant Kumar 2016 | India     | Prospective PK to assess x3 weekly regimen, with DM as one covariate                       | 23/101            | Median age 34 (no breakdown of Dm group)                           | 65.3% male (no breakdown of Dm group)                          | BMI significantly higher in Dm group (20.3 versus 18.4, p0.021)          | 2,4,6,8 hrs                                         | Intensive                                            | 1500                      | Rifampicin 450/600 Isoniazid 600 Pyrazinamide 1500 Ethambutol 1200 +/- Streptomycin 750 3x weekly                         | Pulmonary or EP                       | Known of random blood glucose >200 µg/mL                                                                 | µg/mL Significantly lower DM group Median DM 36 (28.8 – 41.6) versus nonDM 40.5 (34.5-45.0), p0.007. DM non-significant on multivariate analysis                 | AUC 0-8 µg/ml.hr Significantly lower in DM group Median DM 192.6 (158.4-230.4) versus nonDM 232.3 (206.0-256.1-61.1), p<0.001 DM non-significant on multivariate analysis | 2hrs for whole group – no analysis comparing DM to nonDM          | Unknown                                        | Unknown                                 |                                                                                                                                                                                            |
| Kumar 2017        | India     | Prospective multicentre                                                                    | 452/1912          | DM significantly older (median age DM 48yr versus 34, p<0.001)     | Significantly more men in Dm group (73.5% versus 65.7, p0.002) | BMI significantly higher in DM group (20.4 versus 18.2, p<0.001)         | 2hr                                                 | Intensive                                            | 1500                      | Rifampicin 450/600 Isoniazid 600 Pyrazinamide 1500 Ethambutol 1200 +/- Streptomycin 750 3x weekly                         | Pulmonary or EP                       | Known or random blood glucose >200 µg/mL (16% new)                                                       | µg/mL C2hr only DM significantly lower Median DM 31 (22.3-38.0), nonDM 34.1 (24.6-42.7), p<0.001 DM remained significant independent factor on linear regression | NA                                                                                                                                                                        | NA                                                                | Median random blood glucose 263.5 mg/dL        | Majority of diabetes group on treatment | Concentration negatively correlated with blood glucose                                                                                                                                     |
| Alfarisi 2018     | India     | Prospective cohort, both PK and PK-PD                                                      | 101/243           | DM significantly older (median age 48 versus 26, p<0.001)          | Significantly more men in DM group (77% versus 61%, p<0.001)   | Weight significantly increased in DM group (50.8kg versus 45kg, p<0.001) | 0.5, 2,6hrs                                         | x1 intensive x1 continuation                         | 1500                      | Rifampicin 450 Isoniazid 600 Pyrazinamide 1500 Ethambutol 1200 3x weekly<br><br>Rif/iso alone in continuation (3x weekly) | Pulmonary                             | Known or HbA1c >6.5%, fasting blood glucose concentration >126 mg/dl, or random blood glucose >200 mg/dl | µg/mL Significantly lower DM group, remaining significant on adjustment Mean DM 21.59, nonDM 32.75, p0.002, adjusted p0.03                                       | AUC0-6 µg.hr/ml Significantly lower in DM group, remaining significant on adjustment Mean DM 80.89, nonDM 128.43, p<0.001, adjusted p0.003                                |                                                                   | Median HbA1c at baseline 8.9%                  | 44.6% on metformin                      |                                                                                                                                                                                            |
| Mtabho 2019       | Tanzania  | Prospective PK                                                                             | 19/39             | DM significantly older (median age 50yrs versus 38, p0.001)        | No difference in groups (79% male in DM group versus 75%)      | No difference in weight (58kg DM versus 55% non, p0.258)                 | Intensive                                           | Intensive                                            | 1600(>50kg), 1200 (<50kg) | Rifampicin 600/450 Isoniazid 300/225 Pyrazinamide 1600/1200 Ethambutol 1100/825 Weight cut off 50kg Daily                 | Clinical/radiological/microbiological | Known or fasting glucose >7mmol/L                                                                        | mg/L No significant difference Mean DM 34.5 (21.4-46.2), nonDM 38.2 (29.0-50.8) p0.09                                                                            | AUC0-24 mg.h/L No significant difference Mean DM 290 (123-420), nonDM 344 (209-609), p0.08                                                                                | No significant difference Median DM 1.1hrs versus 1.1hrs, p0.25   | Median HbA1c 111mmol/mol                       | 84% on oral medications                 | Cmax/AUC not associated with fasting glucose or HbA1c results                                                                                                                              |
| Ramachandran 2020 | India     | Prospective PK, specifically looking at association between C <sub>2hr</sub> and outcomes. | 113/404           | Median age 40, no breakdown of DM group                            | 64, no breakdown DM group                                      | BMI Median 17.8, no breakdown DM group                                   | 2hrs                                                | Intensive                                            | 1500                      | R 450/600 H 600 Z 1500 E 1200 3x weekly CP: R/H                                                                           | Pulmonary                             | Known or HbA1c >6.5%, or RBG >200 mg/dl                                                                  | µg/mL C <sub>2hr</sub> No significant difference<br><br>Median 34.95 (25.03-43.42 IQR) v 37.49 (28.26-46.17), p0.08                                              | NA                                                                                                                                                                        | NA                                                                | Unknown                                        | Unknown                                 |                                                                                                                                                                                            |
| Kim 2023          | Korea     | Prospective with population PK analysis                                                    | 55/613            | Median age 54yrs, no breakdown DM group                            | 67% male, no breakdown DM group                                | Weight Median 60.8kg, no breakdown DM group                              | Random 1-2 samples for each patient between 0-24hrs | Intensive                                            | 20-30mg/kg                | Not specified                                                                                                             | Microbiologically confirmed pulmonary | Not specified                                                                                            | NA                                                                                                                                                               | NA                                                                                                                                                                        | NA                                                                | Unknown                                        | Unknown                                 | Increased apparent clearance in DM, most significantly in >70yrs group. Decreased AUC 0-24 in >70yrs DM group.                                                                             |

medRxiv preprint doi: <https://doi.org/10.1101/2023.08.29.23294656>; this version posted August 29, 2023. The copyright holder for this preprint (which was not certified by peer review) is the author/funder, who has granted medRxiv a license to display the preprint in perpetuity. It is made available under a CC-BY-NC-ND 4.0 International license.

Isoniazid

| Study               | Country  | Study Design                                                                                                  | Number (DM/Total)                 | Age                                                                | Sex                                                            | Weight                                                                   | Sampling    | TB Treatment Phase                                                                             | Dose (mg)                                                       | Regimen                                                                                                                   | TB Diagnosis                                            | DM Diagnosis                                                                                             | C <sub>max</sub>                                                                                                                                                                                                                                                            | AUC                                                                                                                                                                                                    | T <sub>max</sub> (Hrs)                                                                                                          | DM Control                                     | DM Treatment                            | Other PK                                                                                                                                  |
|---------------------|----------|---------------------------------------------------------------------------------------------------------------|-----------------------------------|--------------------------------------------------------------------|----------------------------------------------------------------|--------------------------------------------------------------------------|-------------|------------------------------------------------------------------------------------------------|-----------------------------------------------------------------|---------------------------------------------------------------------------------------------------------------------------|---------------------------------------------------------|----------------------------------------------------------------------------------------------------------|-----------------------------------------------------------------------------------------------------------------------------------------------------------------------------------------------------------------------------------------------------------------------------|--------------------------------------------------------------------------------------------------------------------------------------------------------------------------------------------------------|---------------------------------------------------------------------------------------------------------------------------------|------------------------------------------------|-----------------------------------------|-------------------------------------------------------------------------------------------------------------------------------------------|
| Heysell 2010        | USA      | Retrospective cohort using routinely collected data TDM carried out for patients defined as 'slow to respond' | 16/39                             | 31% 18-39, 38% 40-54, 31% >65<br>Total group – no breakdown for DM | 67% male of total group (nil breakdown for DM)                 | Unknown                                                                  | 2 hr        | Unknown                                                                                        | Unknown                                                         | Rifampicin Isoniazid Pyrazinamide Ethambutol<br>Some daily, some 2x week R/H                                              | Pulmonary or extrapulmonary Microbiologically confirmed | Unknown                                                                                                  | C <sub>max</sub> defined as C <sub>2hr</sub> sample<br>Normal range 3-6 (daily), 9-18 (biweekly) µg/mL<br>DM not significantly associated with low 2hr H<br>Low H levels – 43% DM, 57% nonDM<br>Normal H levels – 38% DM, 63% nonDM<br>If 2hr H < 3 (0.35-4.70 95% CI 0.71) | NA                                                                                                                                                                                                     | NA                                                                                                                              | Unknown                                        | Unknown                                 | No quantitative C <sub>max</sub> data available comparing DM and non-DM groups                                                            |
| Babalik 2013        | Turkey   | Prospective                                                                                                   | 14/70                             | Significantly higher in DM group (56.5yrs versus 39.0, p0.001)     | 86% DM group male, versus 61% non-DM (p0.116)                  | DM group significantly heavier (68.7kg versus 56.7kg, p0.001)            | 2hr         | Intensive at 14 and 30 days after starting treatment                                           | 300                                                             | 600 Rifampicin 300 Isoniazid 1500 Pyrazinamide 1000 Ethambutol Daily                                                      | Pulmonary, 89% culture confirmed                        | Known                                                                                                    | C2hr only<br>Significantly lower in DM group (day 14 median 3.2 µg/mL nonDM, p<0.05, day 30 median 2.9 nonDM versus 4.0 DM, p<0.05)                                                                                                                                         | NA                                                                                                                                                                                                     | NA                                                                                                                              | Mean HbA1c 6.1% (only included if HbA1c <6.5%) | On treatment                            | Concentration inversely correlated with weight                                                                                            |
| Requena-Mendez 2014 | Peru     | Prospective field PK assessing daily and x2 weekly dosing in DM, HIV and nonDM/HIV groups                     | 25/107 (30 HIV, 52 nonDM/non HIV) | DM significantly older (median 50yrs, versus 29yrs p<0.001)        | 64% DM male, versus 50% TB group (p0.2)                        | BMI significantly increased in DM group (median 27 versus 22.9, p<0.001) | 2, 6 hrs    | 1 sampling event from each participant, 57.9% overall in intensive phase, rest in continuation | 5mg/kg intensive phase, 15mg/kg continuation phase, up to 800mg | Rest of regimen not specified<br>Daily in intensive phase, x2/week in continuation                                        | 72.9% microbiologically confirmed                       | Known                                                                                                    | No significant difference between DM/non-DM in daily or x2 weekly groups (daily group: median 2.6mg/L non-DM, p1, x2/week: median 4.4 DM, p0.3)                                                                                                                             | AUC 0.6 – mg.hr/L<br>No significant difference between DM/non-DM in daily or x2 weekly groups (daily group: median 10.39 DM, 11.05 non-DM, p0.6, x2 weekly: median 54.26 DM, 62.45 nonDM, p0.2)        | 86.4% total highest concentration at 2hrs in daily group, 90.7 in x2/weekly group.<br>No comment on any differences in DM group | Median random blood glucose 119.5mg/dL         | Unknown                                 | Highly variable concentrations in all groups, with >30% not reaching target concentrations.                                               |
| Hemant Kumar 2016   | India    | Prospective PK to assess x3 weekly regimen, with DM as one covariate                                          | 23/101                            | Median age 34 (no breakdown of Dm group)                           | 65.3% male (no breakdown of Dm group)                          | BMI significantly higher in Dm group (20.3 versus 18.4, p0.021)          | 2,4,6,8 hrs | Intensive                                                                                      | 600                                                             | Rifampicin 450/600 Isoniazid 600 Pyrazinamide 1500 Ethambutol 1200 +/- Streptomycin 750 3x weekly                         | Pulmonary or EP                                         | Known of random blood glucose >200 µg/mL                                                                 | No significant difference<br>Median DM 11.5 (8.5 – 14.1) versus nonDM 11.5 (8.5 – 14.1), p0.17                                                                                                                                                                              | AUC 0-8 µg/ml.hr<br>No significant difference<br>Median DM 37.8 (22.9-53.9) versus nonDM 42.9 (34.2-61.1), p0.08                                                                                       | 2hrs for whole group – no analysis comparing DM to nonDM                                                                        | Unknown                                        | Unknown                                 | DM not significant as a factor on multivariate analysis (Cmax and AUC)                                                                    |
| Kumar 2017          | India    | Prospective multicentre                                                                                       | 452/1912                          | DM significantly older (median age DM 48yr versus 34, p<0.001)     | Significantly more men in Dm group (73.5% versus 65.7, p0.002) | BMI significantly higher in DM group (20.4 versus 18.2, p<0.001)         | 2hr         | Intensive                                                                                      | 600                                                             | Rifampicin 450/600 Isoniazid 600 Pyrazinamide 1500 Ethambutol 1200 +/- Streptomycin 750 3x weekly                         | Pulmonary or EP                                         | Known or random blood glucose >200 µg/mL (16% new)                                                       | C2hr only<br>DM significantly lower<br>Median DM 7.6 (6.1-11.3), nonDM 7.6 (6.1-11.3), p<0.001<br>DM remains significant independent factor on linear regression                                                                                                            | NA                                                                                                                                                                                                     | NA                                                                                                                              | Median random blood glucose 263.5 mg/dL        | Majority of diabetes group on treatment | Concentration negatively correlated with blood glucose                                                                                    |
| Alfarisi 2018       | India    | Prospective cohort, both PK and PK-PD                                                                         | 101/243                           | DM significantly older (median age 48 versus 26, p<0.001)          | Significantly more men in DM group (77% versus 61%, p<0.001)   | Weight significantly increased in DM group (50.8kg versus 45kg, p<0.001) | 0.5,2,6hrs  | x1 intensive x1 continuation                                                                   | 600                                                             | Rifampicin 450 Isoniazid 600 Pyrazinamide 1500 Ethambutol 1200 3x weekly<br><br>Rif/Iso alone in continuation (3x weekly) | Pulmonary                                               | Known or HbA1c >6.5%, fasting blood glucose concentration >126 mg/dl, or random blood glucose >200 mg/dl | µg/mL<br>Significantly lower in DM group, not significant after adjustment<br>Intensive: mean DM 5.97, nonDM 7.91, p0.03, adjusted p0.08<br>Continuation: mean DM 7.42, nonDM 7.63, p0.86                                                                                   | AUC 0-6 µg.hr/ml<br>Significantly lower in DM group, not significant after adjustment<br>Intensive: mean DM 20.0, nonDM 26.84, p0.03, adjusted p0.06<br>Continuation: mean DM 23.79, nonDM 26.79 p0.45 |                                                                                                                                 | Median HbA1c at baseline 8.9%                  | 44.6% on metformin                      |                                                                                                                                           |
| Mtabho 2019         | Tanzania | Prospective PK                                                                                                | 19/39                             | DM significantly older (median age 50yrs versus 38, p0.001)        | No difference in groups (79% male in DM group versus 75%)      | No difference in weight (58kg DM versus 55% non, p0.258)                 | Intensive   | Intensive                                                                                      | 300 (>50kg), 225 (<50kg)                                        | Rifampicin 600/450 Isoniazid 300/225 Pyrazinamide 1600/1200 Ethambutol 1100/825<br>Weight cut off 50kg Daily              | Clinical/radiological/microbiological                   | Known or fasting glucose >7mmol/L                                                                        | mg/L<br>Significantly lower in DM group<br>Mean DM 1.6 (0.4-5.8), nonDM 2.8 (1.0-4.6) p0.001                                                                                                                                                                                | AUC 0-24 mg.h/L<br>Significantly lower in DM group<br>Mean DM 5.4 (0.7-26.9), nonDM 10.6(3.7-22.7), p0.01                                                                                              | No significant difference<br>Median DM 1.0hrs versus 1.1hrs, p0.85                                                              | Median HbA1c 111mmol/mol                       | 84% on oral medications                 | Cmax/AUC not associated with fasting glucose or HbA1c results<br>DM significantly associated with Cmax and AUC on multivariate regression |
| Galvao 2020         | Brazil   | Prospective PK                                                                                                | 26/62                             | No difference (median 39yrs versus 44)                             | 100%                                                           | Weight significantly higher in DM group (Median 64kg versus 54kg)        | 2hrs        | Intensive and Continuation                                                                     | 300                                                             | Rifampicin 600 Isoniazid 300 Pyrazinamide 1600 Ethambutol 1100 Daily<br>R/H only in continuation                          | Pulmonary, clinical, radio, micro                       | Fasting glucose >126 mg/dl or HbA1c >6.5%                                                                | µg/mL<br>C2hr only<br>No significant difference<br>Intensive: Median DM 4.82 (3.47-5.5 IQR) versus nonDM 5.0 (4.1-5.5), p0.43.<br>Continuation: Median DM 3.76 (4.1-5.5) versus nonDM 4.15 (3.82-5.18),                                                                     |                                                                                                                                                                                                        |                                                                                                                                 | Median HbA1c 9.6%                              | 15% on treatment                        | No association between concentrations and HbA1c/FBG                                                                                       |

medRxiv preprint doi: <https://doi.org/10.1101/2023.05.22.23284586>; this version posted August 2, 2023. The copyright holder for this preprint (which was not certified by peer review) is the author/funder, who has granted medRxiv a license to display the preprint in perpetuity. It is made available under aCC-BY-NC-ND 4.0 International license.

Isoniazid

|                   |       |                                                                                            |         |                                         |                           |                                        |      |                            |     |                                                                |           |                                         |                                                                                                                                          |    |    |         |         |  |
|-------------------|-------|--------------------------------------------------------------------------------------------|---------|-----------------------------------------|---------------------------|----------------------------------------|------|----------------------------|-----|----------------------------------------------------------------|-----------|-----------------------------------------|------------------------------------------------------------------------------------------------------------------------------------------|----|----|---------|---------|--|
| Ramachandran 2020 | India | Prospective PK, specifically looking at association between C <sub>2hr</sub> and outcomes. | 113/404 | Median age 40, no breakdown of DM group | 64, no breakdown DM group | BMI Median 17.8, no breakdown DM group | 2hrs | Intensive and Continuation | 600 | R 450/600<br>H 600<br>Z 1500<br>E 1200<br>3x weekly<br>CP: R/H | Pulmonary | Known or HbA1c >6.5%, or RBG >200 mg/dl | p0.38<br>µg/mL<br>C <sub>2hr</sub><br>No significant difference<br>Mth 1: 7.34 (2.68-8.28)<br>Mth 5: 5.17-7.89 v 6.63 (3.49-9.09), p0.10 | NA | NA | Unknown | Unknown |  |
|-------------------|-------|--------------------------------------------------------------------------------------------|---------|-----------------------------------------|---------------------------|----------------------------------------|------|----------------------------|-----|----------------------------------------------------------------|-----------|-----------------------------------------|------------------------------------------------------------------------------------------------------------------------------------------|----|----|---------|---------|--|

medRxiv preprint doi: <https://doi.org/10.1101/2023.08.29.23294656>; this version posted August 29, 2023. The copyright holder for this preprint (which was not certified by peer review) is the author/funder, who has granted medRxiv a license to display the preprint in perpetuity. It is made available under a [CC-BY-NC-ND 4.0 International license](https://creativecommons.org/licenses/by-nc-nd/4.0/).

Ethambutol

| Study        | Country   | Study Design   | Number (DM/Total) | Age                                                                | Sex                                                       | Weight                                                        | Sampling  | TB Treatment Phase                                   | Dose (mg)                 | Regimen                                                                                                   | TB Diagnosis                          | DM Diagnosis                                 | C <sub>max</sub>                                                                                       | AUC                                                                                                   | T <sub>max</sub> (Hrs)                                             | DM Control                                     | DM Treatment            | Other PK                                                                                                                                                                                      |
|--------------|-----------|----------------|-------------------|--------------------------------------------------------------------|-----------------------------------------------------------|---------------------------------------------------------------|-----------|------------------------------------------------------|---------------------------|-----------------------------------------------------------------------------------------------------------|---------------------------------------|----------------------------------------------|--------------------------------------------------------------------------------------------------------|-------------------------------------------------------------------------------------------------------|--------------------------------------------------------------------|------------------------------------------------|-------------------------|-----------------------------------------------------------------------------------------------------------------------------------------------------------------------------------------------|
| Ruslami 2010 | Indonesia | Prospective    | 17/34             | Significantly higher DM group Mean 47 (DM) versus 35 (nonDM) p0.00 | Matched (42% male)                                        | Matched (within 5kg) (mean 47.3kg both groups)                | Intensive | Intensive                                            | 750                       | Rifampicin 450mg Isoniazid 300mg Pyrazinamide 1500mg Ethambutol 750mg                                     | Pulmonary                             | Known (60%) Screening via WHO criteria (40%) | mg/L<br>No difference<br>Mean 2.2 (1.9-2.5) DM<br>95% CI) DM<br>1.95 (1.6-2.4) nonDM p0.3              | 0-24 mg x h/L<br>No difference<br>Mean 13.8 (12.0-15.9) DM<br>v 13.5 (12.0-15.1) nonDM<br>p0.77       | No difference<br>Median 3 (1-4 range) DM v 3 (1-6) nonDM p0.93     | Mean HbA1c 11.1%<br>Median FBG 16.6mmol/L      | None                    | No correlation between FBG and AUC/C <sub>max</sub><br>10 DM cases treated with insulin to achieve glycaemic control, with PK repeated 6 weeks later – non significant change in AUC/other PK |
| Babalik 2013 | Turkey    | Prospective    | 14/70             | Significantly higher in DM group (56.5yrs versus 39.0, p0.001)     | 86% DM group male, versus 61% non-DM (p0.116)             | DM group significantly heavier (68.7kg versus 56.7kg, p0.001) | 2hr       | Intensive at 14 and 30 days after starting treatment | 1000                      | 600 Rifampicin 300 Isoniazid 1500 Pyrazinamide 1000 Ethambutol Daily                                      | Pulmonary, 89% culture confirmed      | Known                                        | C2hr only<br>No significant difference between DM and nonDM, p>0.05, mean 2.8 versus 3.6 mg/L (p>0.05) | NA                                                                                                    | NA                                                                 | Mean HbA1c 6.1% (only included if HbA1c <6.5%) | On treatment            |                                                                                                                                                                                               |
| Mtabho 2019  | Tanzania  | Prospective PK | 19/39             | DM significantly older (median age 50yrs versus 38, p0.001)        | No difference in groups (79% male in DM group versus 75%) | No difference in weight (58kg DM versus 55kg non, p0.258)     | Intensive | Intensive                                            | 1100 (>50kg), 825 (<50kg) | Rifampicin 600/450 Isoniazid 300/225 Pyrazinamide 1600/1200 Ethambutol 1100/825 Weight cut off 50kg Daily | Clinical/radiological/microbiological | Known or fasting glucose >7mmol/L            | mg/L<br>No significant difference<br>Mean DM 3.3 (2.2-5.0) versus 3.3 (2.2-5.0) nonDM p0.67            | AUC0-24 mg.h/L<br>No significant difference<br>Mean DM 19.6 (7.5-40.4), nonDM 20.2 (13.4-32.0), p0.78 | No significant difference<br>Median DM 2.0hrs versus 2.0hrs, p0.31 | Median HbA1c 11.1mmol/mol                      | 84% on oral medications | C <sub>max</sub> /AUC not associated with fasting glucose or HbA1c results                                                                                                                    |

medRxiv preprint doi: <https://doi.org/10.1101/2023.08.29.23294556>; this version posted August 29, 2023. The copyright holder for this preprint (which was not certified by peer review) is the author/funder, who has granted medRxiv a license to display the preprint in perpetuity. It is made available under a CC-BY 4.0 International license.

Other

| Study        | Agent        | Country         | Study Design                                                                      | Number (DM/Total) | Age                                 | Sex                                      | Weight                                              | Sampling                   | TB Treatment Phase | Dose (mg)              | Regimen | TB Diagnosis                                                   | DM Diagnosis | C <sub>max</sub>                                                                               | AUC                                                                                                          | DM Control                             | DM Treatment            | Other PK                                                                                                                     |
|--------------|--------------|-----------------|-----------------------------------------------------------------------------------|-------------------|-------------------------------------|------------------------------------------|-----------------------------------------------------|----------------------------|--------------------|------------------------|---------|----------------------------------------------------------------|--------------|------------------------------------------------------------------------------------------------|--------------------------------------------------------------------------------------------------------------|----------------------------------------|-------------------------|------------------------------------------------------------------------------------------------------------------------------|
| Zhu 2018     | Cycloserine  | China           | Retrospective – all cases receiving TDM last 4 years, DM a covariant              | 19/200            | Mean 35.8, no b/down DM group       | 63% male, no breakdown Dm group          | Mean BMI 21.3, no b/down DM group                   | 2hr                        | Unknown            | 500 <50kg<br>750 >50kg | Unknown | Unknown                                                        | Known        | NA                                                                                             | NA                                                                                                           | Unknown                                | Unknown                 | Normal range 20-35 µg/ml<br>No significant difference in % DM with low concentrations<br>DM 68% low v nonDM 60% low (p0.427) |
| Zhu 2018     | Linezolid    | China           | Retrospective – all cases receiving TDM last 4 years, DM a covariant              | 6/65              | Mean 34.7, no b/down DM group       | 52% male, no b/down DM group             | Mean BMI 21.2, no b/down DM group                   | 2hr                        | Unknown            | 600                    | Unknown | Unknown                                                        | Known        | NA                                                                                             | NA                                                                                                           | Unknown                                | Unknown                 | Normal range 12-26 µg/ml<br>No significant difference in % DM with low concentrations<br>DM 17% low v nonDM 21% low (p1.00)  |
| Dekkers 2019 | Moxifloxacin | The Netherlands | Retrospective – all DM cases receiving moxi TDM over 12 yrs with matched controls | 16/32             | Matched Median 52 (DM) v 49 (nonDM) | Matched 69% male (DM) v 63% male (nonDM) | BMI - No signif difference 21.9 (DM) v 20.7 (nonDM) | Varied, median 6-7 samples | Intensive          | 6.5-6.6mg/kg           | Varied  | 50% pTB (DM), 75% pTB (nonDM)<br>31% MDR (DM), 38% MDR (nonDM) | Known        | Mg/L<br>Significantly lower in DM<br>Median DM 1.7 (IQR 1.3-2.6) v nonDM 2.4 (2.0-3.0), p<0.05 | 0-24 mg.hr/L<br>Significantly lower in DM<br>Median DM 17.4 (IQR 12.5-21.8) v nonDM 23.2 (16.8-32.1), p<0.05 | Median HbA1c 8.3% (only in 9 patients) | 14/16 receiving insulin | Clearance increased in DM group<br>No difference in Tlag/ka                                                                  |

medRxiv preprint doi: <https://doi.org/10.1101/2023.08.29.23294556>; this version posted August 29, 2023. The copyright holder for this preprint (which was not certified by peer review) is the author/funder, who has granted medRxiv a license to display the preprint in perpetuity. It is made available under a [CC-BY-NC-ND 4.0 International license](https://creativecommons.org/licenses/by-nc-nd/4.0/).
